# Supplementary material for: IL-12 involvement in myogenic differentiation of C2C12 in vitro
Source: Royal Society of Chemistry journal article supplement (doi:10.1039/c4bm00315b), 2014-10-16
Supplement: c4bm00315b1.pdf [file c4bm00315b1.pdf]

C2C12 feeder vs MEF feeder

| Upregulated Genes | Fold Regulation | Downregulated Genes | Fold Regulation |
|-------------------|-----------------|---------------------|-----------------|
| Ccl11             | 2.5918          | Bmp2                | -12.8287        |
| Cxcl1             | 7.301           | Bmp4                | -2.1947         |
| Cxcl5             | 11.7917         | Bmp6                | -9.1622         |
| Ifn- $\gamma$     | 2.5228          | Ccl12               | -2.2779         |
| IL-12a            | 7.9003          | Ccl17               | -4.8346         |
| IL-18             | 2.8837          | Ccl19               | -3.3028         |
| Spp1              | 4.0061          | Ccl2                | -4.7535         |
|                   |                 | Ccl20               | -23.1445        |
|                   |                 | Ccl3                | -5.1762         |
|                   |                 | Ccl4                | -4.2038         |
|                   |                 | Ccl5                | -2.36           |
|                   |                 | Ccl7                | -4.2454         |
|                   |                 | Csf1                | -5.7805         |
|                   |                 | Csf2                | -2.4249         |
|                   |                 | Cxcl10              | -4.2134         |
|                   |                 | Cxcl12              | -3.3005         |
|                   |                 | Cxcl16              | -2.7743         |
|                   |                 | Cxcl3               | -2.1966         |
|                   |                 | Gpi1                | -3.6311         |
|                   |                 | Il11                | -21.7328        |
|                   |                 | Il7                 | -6.1131         |
|                   |                 | Lif                 | -4.8538         |
|                   |                 | Mif                 | -3.4536         |
|                   |                 | Pf4                 | -2.0285         |
|                   |                 | Ppibp               | -20.7322        |
|                   |                 | Tgfb2               | -4.471          |
|                   |                 | Tnfrsf11b           | -52.542         |
|                   |                 | Tnfrsf11            | -20.5249        |
|                   |                 | Actb                | -3.5303         |
|                   |                 | Gapdh               | -2.1323         |
|                   |                 | Gusb                | -3.3205         |
|                   |                 | Hsp90ab1            | -2.0065         |

**Supp. 1:** Screening of cytokine and chemokine expression in C2C12 and MEF cells. C2C12 and MEF feeder layer cells were cultured for 3 days and analyzed using a PCR array for 84 chemokine and cytokine genes. 7 genes were up-regulated in C2C12 compared to MEF feeder cells (left table). The down-regulated genes in the same system are provided in the right table.

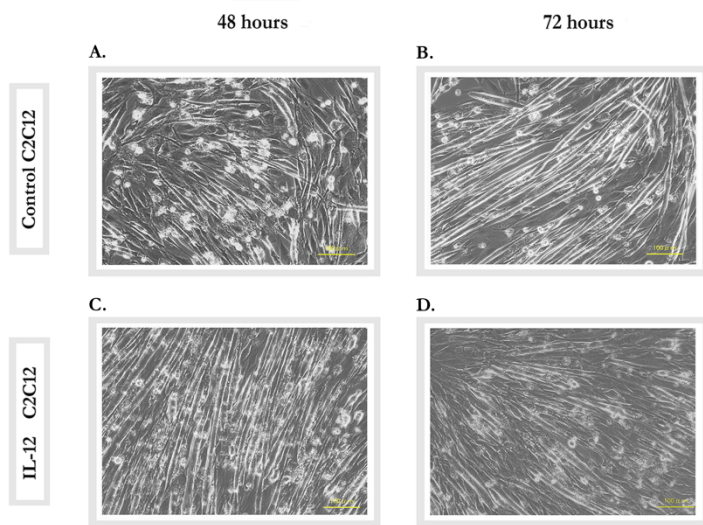

**Supp. 2:** Comparison of the differentiation of IL-12-C2C12 and control C2C12 cells after 48 h and 72 h. After 48 hours of differentiation, control C2C12 cells (A) showed decreased myotube formation compared to IL-12-C2C12 (C). After 72 hours, myotube formation in control (B) and IL-12 overexpressing cells (D) was not significantly different.
